# Supplementary material
Source: PubMed Central journal article supplement (PMC6714044)
Supplement: NIHMS1047779-supplement-Supplement.pdf [file NIHMS1047779-supplement-Supplement.pdf]

**DO GENETIC SUSCEPTIBILITY VARIANTS ASSOCIATE WITH DISEASE SEVERITY IN EARLY ACTIVE RHEUMATOID ARTHRITIS?**

**ONLINE SUPPLEMENTARY DATA**

**Index**

Page 2: Supplementary Table 1. Genotyping Quality Control Procedures

Page 3: Supplementary Table 2. Proxy SNPs Used In Analysis

Page 4: Supplementary Table 3. Clinical Factors Associated With Larsen Scores in CARDERA

Pages 5 to 6: Supplementary Table 4. Association between 69 RA Susceptibility SNPs and Radiological Progression in CARDERA Using a Linear Mixed-Effects Model

Page 7: Supplementary Table 5. Association between RA *HLA-DRB1* Susceptibility Alleles and Radiological Progression in CARDERA Using a Linear Mixed-Effects Model

Page 8: Supplementary Table 6. Relationship between HLA Amino Acid Polymorphisms and Radiological Progression in CARDERA Using a Linear Mixed-Effects Model

Page 9: Supplementary Table 7. Weighted Genetic Risk Score Associations with Disease Outcomes in CARDERA

Page 10: Supplementary Table 8. Genetic Variants Attaining Nominal Association with DAS28

Page 11: Supplementary Table 9. Genetic Variants Attaining a Significant or Nominal Association with HAQ Scores

Page 12: References

**Supplementary Table 1. Genotyping Quality Control Procedures**

| <b>Individual-Level QC</b>               |                                   |                                |
|------------------------------------------|-----------------------------------|--------------------------------|
| <b>QC Stage</b>                          | <b>No. Individuals In Dataset</b> | <b>No. Individuals Removed</b> |
| Pre-QC                                   | 560                               | -                              |
| <95% SNP call rates                      | 552                               | 8                              |
| Anomalously high/low heterozygosity      | 550                               | 2                              |
| Non-European ancestry <sup>a</sup>       | 530                               | 20                             |
| Relatedness                              | 530                               | 0                              |
| Genotype-phenotype gender discordance    | 528                               | 2                              |
| Duplicate samples                        | 524                               | 4                              |
| Post-QC                                  | 524                               | -                              |
| <b>Marker-Level QC</b>                   |                                   |                                |
| <b>QC Stage</b>                          | <b>No. SNPs In Dataset</b>        | <b>No. SNPs Removed</b>        |
| Pre-QC                                   | 196,524                           | -                              |
| Marker missingness >5%                   | 193,054                           | 3,470                          |
| Not in GRCh37 assembly/duplicate markers | 191,306                           | 1,748                          |
| HWE ( $P < 0.00001$ )                    | 188,148                           | 3,158                          |
| MAF < 0.01                               | 138,873                           | 49,275                         |
| Post-QC                                  | 138,873                           | -                              |

a= Ethnic outliers identified by principal components analysis (PCA) plots of samples merged with HapMap3 data; QC = quality control; No. = number; GRCh37 = Genome Reference Consortium Human Build 37; MAF = minor allele frequency; HWE = Hardy-Weinberg equilibrium.

**Supplementary Table 2. Proxy SNPs Used In Analysis**

| Meta-Analysis SNP |     |             |           | Proxy SNP  |             |           |                |
|-------------------|-----|-------------|-----------|------------|-------------|-----------|----------------|
| SNP               | Chr | BP Position | A1/<br>A2 | SNP        | BP Position | A1/<br>A2 | r <sup>2</sup> |
| chr1:2523811      | 1   | 2523811     | G/A       | rs10752747 | 2524915     | G/T       | 0.875          |
| chr17:38031857    | 17  | 38031857    | G/T       | rs10852935 | 38031674    | T/C       | 0.979          |
| rs10790268        | 11  | 118729391   | G/A       | rs10892299 | 118726843   | C/T       | 0.915          |
| rs71508903        | 10  | 63779871    | T/C       | rs11593907 | 63786554    | C/T       | 0.865          |
| rs73194058        | 21  | 34764288    | C/A       | rs11702844 | 34759876    | A/G       | 0.970          |
| rs4452313         | 3   | 17047032    | T/A       | rs12108065 | 17074871    | G/A       | 0.925          |
| rs2105325         | 1   | 173349725   | C/A       | rs1557121  | 173353881   | C/T       | 0.986          |
| rs6715284         | 2   | 202154397   | G/C       | rs16837131 | 202173812   | A/C       | 0.972          |
| rs2736337         | 8   | 11341880    | C/T       | rs2061831  | 11339882    | C/T       | 0.993          |
| rs5987194         | X   | 153301467   | C/G       | rs2075596  | 153297392   | A/G       | 0.989          |
| rs331463          | 11  | 36501787    | T/A       | rs2303439  | 36514290    | C/T       | 0.944          |
| rs28411352        | 1   | 38278579    | T/C       | rs2306627  | 38260503    | T/C       | 0.844          |
| chr21:35928240    | 21  | 35928240    | C/T       | rs2834512  | 35911599    | G/A       | 0.979          |
| rs8083786         | 18  | 12881361    | G/A       | rs34846641 | 12875975    | G/A       | 1.000          |
| chr7:128580042    | 7   | 128580042   | G/A       | rs3778754  | 128575552   | G/C       | 0.948          |
| rs3824660         | 10  | 8104722     | C/T       | rs3802604  | 8102272     | G/A       | 0.926          |
| rs508970          | 11  | 60906450    | A/G       | rs595158   | 60909581    | C/A       | 0.929          |
| rs10774624        | 12  | 111833788   | G/A       | rs653178   | 112007756   | C/T       | 0.861          |
| rs1516971         | 8   | 129542100   | T/C       | rs6651252  | 129567181   | T/C       | 0.985          |
| rs1633360         | 12  | 58108052    | T/C       | rs701006   | 58106836    | G/A       | 0.979          |
| rs773125          | 12  | 56394954    | A/G       | rs705700   | 56389293    | T/C       | 0.967          |
| rs706778          | 10  | 6098949     | T/C       | rs7073236  | 6106552     | C/T       | 0.910          |
| rs10175798        | 2   | 30449594    | A/G       | rs7579944  | 30445026    | C/T       | 0.940          |
| rs9603616         | 13  | 40368069    | C/T       | rs7993214  | 40350912    | C/T       | 0.936          |
| rs2234067         | 6   | 36355654    | C/A       | rs879036   | 36349890    | C/T       | 0.964          |
| rs12140275        | 1   | 38633879    | A/T       | rs883220   | 38616871    | C/A       | 0.962          |
| rs1950897         | 14  | 68760141    | T/C       | rs911263   | 68753593    | T/C       | 0.994          |
| rs9372120         | 6   | 106667535   | G/T       | rs9386514  | 106636902   | C/T       | 0.992          |
| rs72717009        | 1   | 161405053   | T/C       | rs9427372  | 161399920   | C/T       | 0.966          |
| rs9826828         | 3   | 136402060   | A/G       | rs9858105  | 136219264   | C/T       | 1.000          |
| rs8133843         | 21  | 36738242    | A/G       | rs9979383  | 36715761    | T/C       | 0.894          |

Proxy SNPs obtained using 1,000 Genomes European population panels (CEU/TSI/GBR/FIN/IBS); BP position = base pair position based on GRCh37 assembly; Chr = chromosome; reference meta-analysis by Okada *et al* (1).

**Supplementary Table 3. Clinical Factors Associated With Larsen Scores in CARDERA**

| <b>Variable</b>         |                       | <b>β (95% CI)</b> | <b>P-Value</b> |
|-------------------------|-----------------------|-------------------|----------------|
| <i>Time</i>             |                       | 1.20 (1.17-1.24)  | <0.001         |
| <i>Treatment*</i>       | <i>MTX</i>            | Reference         | -              |
|                         | <i>MTX/CIC</i>        | 1.22 (0.95-1.56)  | 0.115          |
|                         | <i>MTX/Pred</i>       | 0.95 (0.74-1.23)  | 0.708          |
|                         | <i>Triple Therapy</i> | 0.85 (0.67-1.09)  | 0.200          |
|                         | <i>Anakinra</i>       | 1.40 (1.01-1.95)  | 0.045          |
| <i>Age</i>              |                       | 1.04 (1.03-1.05)  | <0.001         |
| <i>Disease Duration</i> |                       | 1.04 (1.02-1.06)  | <0.001         |
| <i>RF</i>               |                       | 1.35 (1.12-1.62)  | 0.002          |

Effect sizes and *P*-values from a linear mixed-effects model including time and clinical factors only as fixed-effects predictor variables; CI = confidence interval; MTX = methotrexate; CIC = ciclosporin; Pred = prednisolone; triple therapy = methotrexate, ciclosporin and prednisolone; \*although *P*-values are given for each treatment group, including treatment as a model covariate resulted in a significantly lower AIC (P=0.018).

**Supplementary Table 4. Association between 69 RA Susceptibility SNPs and Radiological Progression in CARDERA Using a Linear Mixed-Effects Model**

| SNP                    | Chr | Gene                      | A1/A2 | Allele Frequency |         | $\beta$ | P-Value |
|------------------------|-----|---------------------------|-------|------------------|---------|---------|---------|
|                        |     |                           |       | Meta-Analysis    | CARDERA |         |         |
| rs660895 <sup>A</sup>  | 6   | <i>HLA-DRB1</i>           | G/A   | 0.46             | 0.37    | 1.074   | 0.0003  |
| rs7579944              | 2   | <i>LBH</i>                | C/T   | 0.65             | 0.66    | 1.057   | 0.0074  |
| rs12108065             | 3   | <i>PLCL2</i>              | G/A   | 0.30             | 0.28    | 1.053   | 0.0194  |
| rs10852935             | 17  | <i>IKZF3-CSF3</i>         | T/C   | 0.48             | 0.50    | 0.958   | 0.0253  |
| rs653178               | 12  | <i>SH2B3-PTPN11</i>       | C/T   | 0.51             | 0.51    | 0.958   | 0.0338  |
| rs3802604              | 10  | <i>GATA3</i>              | G/A   | 0.38             | 0.36    | 1.039   | 0.0615  |
| rs11593907             | 10  | <i>ARID5B</i>             | C/T   | 0.24             | 0.20    | 0.959   | 0.0836  |
| rs7752903              | 6   | <i>TNFAIP3</i>            | G/T   | 0.04             | 0.04    | 0.919   | 0.0950  |
| rs624988               | 1   | <i>CD2</i>                | T/C   | 0.42             | 0.40    | 0.967   | 0.0971  |
| rs678347               | 8   | <i>GRHL2</i>              | G/A   | 0.29             | 0.28    | 0.963   | 0.0981  |
| rs2075596 <sup>B</sup> | X   | <i>IRAK1</i>              | A/G   | 0.15             | 0.15    | 1.048   | 0.1309  |
| rs998731               | 8   | <i>TPD52</i>              | T/C   | 0.45             | 0.48    | 0.972   | 0.1324  |
| rs11889341             | 2   | <i>STAT4</i>              | T/C   | 0.25             | 0.25    | 1.036   | 0.1398  |
| rs4239702              | 20  | <i>CD40</i>               | C/T   | 0.75             | 0.74    | 1.031   | 0.1576  |
| rs968567               | 11  | <i>FADS1-FADS2-FADS3</i>  | C/T   | 0.84             | 0.84    | 1.037   | 0.1657  |
| rs34846641             | 18  | <i>PTPN2</i>              | G/A   | 0.17             | 0.17    | 0.965   | 0.1682  |
| rs2561477              | 5   | <i>C5orf30</i>            | G/A   | 0.70             | 0.69    | 1.028   | 0.1849  |
| rs73081554             | 3   | <i>DNASE1L3-ABHD6-PXK</i> | T/C   | 0.08             | 0.09    | 0.957   | 0.1937  |
| rs17264332             | 6   | <i>TNFAIP3</i>            | G/A   | 0.24             | 0.26    | 0.974   | 0.2239  |
| rs11702844             | 21  | <i>IFNGR2</i>             | A/G   | 0.88             | 0.87    | 1.036   | 0.2250  |
| rs2075596 <sup>C</sup> | X   | <i>IRAK1</i>              | A/G   | 0.15             | 0.15    | 0.956   | 0.2284  |
| rs9386514              | 6   | <i>ATG5</i>               | C/T   | 0.21             | 0.21    | 0.973   | 0.2381  |
| rs1858037              | 2   | <i>SPRED2</i>             | T/A   | 0.68             | 0.68    | 0.980   | 0.3253  |
| rs10752747             | 1   | <i>TNFRSF14-MMEL1</i>     | G/T   | 0.70             | 0.67    | 1.020   | 0.3354  |
| rs595158               | 11  | <i>CD5</i>                | C/A   | 0.51             | 0.54    | 0.983   | 0.4006  |
| rs1893592              | 21  | <i>UBASH3A</i>            | A/C   | 0.73             | 0.73    | 0.983   | 0.4172  |
| rs3087243              | 2   | <i>CTLA4</i>              | G/A   | 0.59             | 0.55    | 1.015   | 0.4240  |
| rs45475795             | 4   | <i>IL2-IL21</i>           | G/A   | 0.08             | 0.08    | 0.975   | 0.4468  |
| rs8026898              | 15  | <i>LOC145837</i>          | A/G   | 0.29             | 0.30    | 1.017   | 0.4492  |
| rs1571878              | 6   | <i>CCR6</i>               | C/T   | 0.47             | 0.47    | 0.986   | 0.4688  |
| rs10985070             | 9   | <i>TRAF1-C5</i>           | C/A   | 0.44             | 0.41    | 1.012   | 0.5212  |
| rs9427372              | 1   | <i>FCGR2A</i>             | C/T   | 0.12             | 0.09    | 0.980   | 0.5564  |
| rs879036               | 6   | <i>ETV7</i>               | C/T   | 0.88             | 0.88    | 0.983   | 0.5810  |
| rs34695944             | 2   | <i>REL</i>                | C/T   | 0.39             | 0.39    | 1.010   | 0.6105  |
| rs7993214              | 13  | <i>COG6</i>               | C/T   | 0.68             | 0.69    | 1.011   | 0.6180  |
| rs11574914             | 9   | <i>CCL19-CCL21</i>        | A/G   | 0.36             | 0.37    | 1.010   | 0.6298  |
| rs2301888              | 1   | <i>PADI4</i>              | G/A   | 0.67             | 0.66    | 0.991   | 0.6404  |
| rs2306627              | 1   | <i>MTF1-INPP5B</i>        | T/C   | 0.31             | 0.30    | 1.009   | 0.6518  |

|            |    |                     |     |      |      |       |        |
|------------|----|---------------------|-----|------|------|-------|--------|
| rs883220   | 1  | <i>LOC339442</i>    | C/A | 0.77 | 0.76 | 0.990 | 0.6522 |
| rs2451258  | 6  | <i>TAGAP</i>        | T/C | 0.67 | 0.62 | 0.991 | 0.6575 |
| rs2228145  | 1  | <i>IL6R</i>         | A/C | 0.62 | 0.60 | 0.991 | 0.6624 |
| rs13330176 | 16 | <i>IRF8</i>         | A/T | 0.25 | 0.27 | 1.009 | 0.6717 |
| rs909685   | 22 | <i>SYNGR1</i>       | A/T | 0.32 | 0.32 | 1.008 | 0.6926 |
| rs3218251  | 22 | <i>IL2RB</i>        | A/T | 0.28 | 0.28 | 0.991 | 0.6931 |
| rs17668708 | 1  | <i>PTPRC</i>        | C/T | 0.91 | 0.90 | 1.012 | 0.7098 |
| rs2303439  | 11 | <i>TRAF6-RAG1/2</i> | C/T | 0.86 | 0.87 | 1.011 | 0.7108 |
| rs701006   | 12 | <i>CDK4</i>         | G/A | 0.60 | 0.60 | 0.993 | 0.7338 |
| rs947474   | 10 | <i>PRKCQ</i>        | A/G | 0.83 | 0.83 | 0.992 | 0.7412 |
| rs2834512  | 21 | <i>RCANI</i>        | G/A | 0.89 | 0.89 | 1.010 | 0.7485 |
|            |    | <i>RUNX1-</i>       |     |      |      |       |        |
| rs9979383  | 21 | <i>LOC100506403</i> | T/C | 0.65 | 0.65 | 1.006 | 0.7567 |
| rs10892299 | 11 | <i>CXCR5</i>        | C/T | 0.83 | 0.83 | 0.993 | 0.7656 |
| rs67250450 | 7  | <i>JAZF1</i>        | T/C | 0.80 | 0.81 | 0.993 | 0.7791 |
| rs705700   | 12 | <i>CDK2</i>         | T/C | 0.61 | 0.62 | 1.005 | 0.7871 |
| rs911263   | 14 | <i>RAD51B</i>       | T/C | 0.73 | 0.73 | 0.994 | 0.7890 |
| rs3806624  | 3  | <i>EOMES</i>        | G/A | 0.47 | 0.44 | 0.995 | 0.7896 |
| rs9858105  | 3  | <i>IL20RB</i>       | C/T | 0.02 | 0.01 | 1.021 | 0.8146 |
| rs9653442  | 2  | <i>AFF3</i>         | C/T | 0.49 | 0.51 | 1.004 | 0.8189 |
| rs7073236  | 10 | <i>IL2RA</i>        | C/T | 0.44 | 0.43 | 0.996 | 0.8353 |
| rs16837131 | 2  | <i>CFLAR-CASP8</i>  | A/C | 0.10 | 0.11 | 1.005 | 0.8745 |
| rs8032939  | 15 | <i>RASGRP1</i>      | C/T | 0.28 | 0.26 | 1.003 | 0.8830 |
| rs11933540 | 4  | <i>C4orf52</i>      | C/T | 0.34 | 0.34 | 0.997 | 0.8872 |
| rs4409785  | 11 | <i>CEP57</i>        | C/T | 0.19 | 0.19 | 0.997 | 0.8912 |
| rs2061831  | 8  | <i>BLK</i>          | C/T | 0.27 | 0.25 | 0.997 | 0.8940 |
| rs4272     | 7  | <i>CDK6</i>         | G/A | 0.23 | 0.23 | 1.003 | 0.8946 |
| rs1980422  | 2  | <i>CD28</i>         | C/T | 0.25 | 0.22 | 1.002 | 0.9251 |
| rs2476601  | 1  | <i>PTPN22</i>       | A/G | 0.16 | 0.15 | 1.002 | 0.9284 |
| rs1557121  | 1  | <i>LOC100506023</i> | C/T | 0.77 | 0.76 | 0.999 | 0.9664 |
| rs3778754  | 7  | <i>IRF5</i>         | G/C | 0.49 | 0.51 | 1.001 | 0.9688 |
| rs34536443 | 19 | <i>TYK2</i>         | G/C | 0.97 | 0.97 | 1.002 | 0.9716 |
| rs6651252  | 8  | <i>PVT1</i>         | T/C | 0.88 | 0.88 | 1.001 | 0.9723 |

Alleles ordered by significance (most significant listed first); A = SNP A1 frequency data from Raychaudhuri *et al* meta-analysis (2) (data unavailable in Eyre *et al* meta-analysis (3)); B = result in females; C = result in males; Chr = chromosome; unless otherwise stated reference meta-analysis is by Okada *et al* (1).

**Supplementary Table 5. Association between RA *HLA-DRB1* Susceptibility Alleles and Radiological Progression in CARDERA Using a Linear Mixed-Effects Model**

| <i>HLA-DRB1</i><br>Allele | Allele Frequency  |         | $\beta$ | <i>P</i> -<br>Value |
|---------------------------|-------------------|---------|---------|---------------------|
|                           | Meta-<br>Analysis | CARDERA |         |                     |
| *04:01                    | 0.31              | 0.22    | 1.10    | 0.0002              |
| *04:08                    | 0.02              | 0.01    | 1.36    | 0.0043              |
| *13:02                    | 0.01              | 0.02    | 0.88    | 0.0840              |
| *15:01                    | 0.09              | 0.10    | 0.95    | 0.0973              |
| *03:01                    | 0.08              | 0.11    | 0.95    | 0.1110              |
| *13:01                    | 0.02              | 0.02    | 0.92    | 0.2031              |
| *07:01                    | 0.06              | 0.09    | 0.97    | 0.3400              |
| *10:01                    | 0.02              | 0.01    | 0.92    | 0.3612              |
| *14:01                    | 0.01              | 0.01    | 1.08    | 0.4875              |
| *01:01                    | 0.13              | 0.13    | 1.02    | 0.5026              |
| *04:04                    | 0.09              | 0.09    | 0.98    | 0.6475              |
| *11:04                    | 0.01              | 0.02    | 0.97    | 0.6810              |
| *11:01                    | 0.03              | 0.04    | 1.02    | 0.7756              |
| *04:05                    | 0.01              | 0.01    | 1.01    | 0.8902              |
| *08:01                    | 0.01              | 0.02    | 1.00    | 0.9971              |

Alleles ordered by significance (most significant listed first); reference meta-analysis by Raychaudhuri *et al* (2).

**Supplementary Table 6. Relationship between HLA Amino Acid Polymorphisms and Radiological Progression in CARDERA Using a Linear Mixed-Effects Model**

| HLA Amino Acid                           | Amino Acid Frequency |         | $\beta$ | P-Value |
|------------------------------------------|----------------------|---------|---------|---------|
|                                          | Meta-Analysis        | CARDERA |         |         |
| DR $\beta$ 1; position 13; Histidine     | 0.45                 | 0.35    | 1.07    | 0.0005  |
| DR $\beta$ 1; position 11; Valine        | 0.47                 | 0.36    | 1.07    | 0.0012  |
| DR $\beta$ 1; position 13; Serine        | 0.18                 | 0.23    | 0.95    | 0.0278  |
| DR $\beta$ 1; position 71; Lysine        | 0.40                 | 0.34    | 1.05    | 0.0293  |
| DR $\beta$ 1; position 71; Glutamic Acid | 0.05                 | 0.06    | 0.91    | 0.0308  |
| DR $\beta$ 1; position 71; Alanine       | 0.09                 | 0.11    | 0.94    | 0.0625  |
| DR $\beta$ 1; position 11; Serine        | 0.21                 | 0.27    | 0.96    | 0.0901  |
| DR $\beta$ 1; position 74; Alanine       | 0.80                 | 0.74    | 1.04    | 0.0929  |
| DR $\beta$ 1; position 74; Arginine      | 0.08                 | 0.11    | 0.95    | 0.1119  |
| DR $\beta$ 1; position 13; Arginine      | 0.10                 | 0.12    | 0.95    | 0.1133  |
| DR $\beta$ 1; position 11; Proline       | 0.10                 | 0.12    | 0.95    | 0.1135  |
| DR $\beta$ 1; position 11; Aspartic Acid | 0.01                 | 0.01    | 0.90    | 0.2048  |
| DR $\beta$ 1; position 13; Tyrosine      | 0.06                 | 0.09    | 0.97    | 0.3379  |
| DR $\beta$ 1; position 11; Glycine       | 0.06                 | 0.09    | 0.97    | 0.3381  |
| DR $\beta$ 1; position 74; Glutamine     | 0.06                 | 0.09    | 0.97    | 0.3407  |
| DP $\beta$ 1; position 9; Histidine      | 0.04                 | 0.05    | 0.95    | 0.3863  |
| DR $\beta$ 1; position 13; Glycine       | 0.03                 | 0.04    | 1.04    | 0.4572  |
| DR $\beta$ 1; position 74; Leucine       | 0.01                 | 0.02    | 1.04    | 0.5478  |
| DP $\beta$ 1; position 9; Phenylalanine  | 0.80                 | 0.73    | 1.01    | 0.5764  |
| B; position 9; Tyrosine                  | 0.64                 | 0.65    | 1.01    | 0.6844  |
| DR $\beta$ 1; position 11; Leucine       | 0.15                 | 0.15    | 1.01    | 0.6857  |
| B; position 9; Histidine                 | 0.23                 | 0.22    | 0.99    | 0.7337  |
| DR $\beta$ 1; position 13; Phenylalanine | 0.18                 | 0.18    | 0.99    | 0.7829  |
| DR $\beta$ 1; position 71; Arginine      | 0.46                 | 0.49    | 1.00    | 0.8221  |
| DP $\beta$ 1; position 9; Tyrosine       | 0.17                 | 0.22    | 0.99    | 0.8245  |
| DR $\beta$ 1; position 74; Glutamic Acid | 0.04                 | 0.04    | 0.99    | 0.8754  |
| B; position 9; Aspartic Acid             | 0.13                 | 0.13    | 1.00    | 0.8912  |

Amino acids ordered by significance (most significant listed first); reference meta-analysis by Raychaudhuri *et al* (2).



**Supplementary Table 7. Weighted Genetic Risk Score Associations with Disease Outcomes in CARDERA**

| wGRS Type | Larsen Progression |          | DAS28 Intercept |          | DAS28 Slope 1 |          | DAS28 Slope 2 |          | HAQ Intercept |          | HAQ Slope 1 |          | HAQ Slope 2 |          |
|-----------|--------------------|----------|-----------------|----------|---------------|----------|---------------|----------|---------------|----------|-------------|----------|-------------|----------|
|           | $\beta$            | <i>P</i> | $\beta$         | <i>P</i> | $\beta$       | <i>P</i> | $\beta$       | <i>P</i> | $\beta$       | <i>P</i> | $\beta$     | <i>P</i> | $\beta$     | <i>P</i> |
| Full      | 1.03               | 0.04     | 0.51            | 0.41     | -0.12         | 0.11     | 0.02          | 0.78     | 0.01          | 0.72     | -0.08       | 0.02     | 0.05        | 0.06     |
| HLA       | 1.04               | <0.01    | 0.09            | 0.04     | -0.06         | 0.26     | 0.02          | 0.69     | 0.01          | 0.70     | -0.05       | 0.03     | 0.03        | 0.08     |
| Non-HLA   | 0.99               | 0.67     | -0.07           | 0.41     | -0.06         | 0.51     | 0.01          | 0.96     | 0.003         | 0.95     | -0.05       | 0.23     | 0.02        | 0.53     |

The Larsen progression  $\beta$  and P-values are from the genotype\*time interaction term in the linear mixed-effects model.

**Supplementary Table 8. Genetic Variants Attaining Nominal Associations with DAS28**

| SNPs                                         |     |                       |    |           |          |         |          |         |          |
|----------------------------------------------|-----|-----------------------|----|-----------|----------|---------|----------|---------|----------|
| SNP                                          | Chr | Gene                  | A1 | Intercept |          | Slope 1 |          | Slope 2 |          |
|                                              |     |                       |    | $\beta$   | <i>P</i> | $\beta$ | <i>P</i> | $\beta$ | <i>P</i> |
| rs10752747                                   | 1   | <i>TNFRSF14-MMEL1</i> | G  | 0.113     | 0.1710   | -0.141  | 0.1261   | 0.184   | 0.0434   |
| rs1980422                                    | 2   | <i>CD28</i>           | C  | 0.200     | 0.0305   | -0.141  | 0.1695   | -0.080  | 0.4370   |
| rs9858105                                    | 3   | <i>IL20RB</i>         | C  | -0.125    | 0.7170   | -1.046  | 0.0044   | 0.783   | 0.0339   |
| rs9386514                                    | 6   | <i>ATG5</i>           | C  | -0.239    | 0.0124   | 0.155   | 0.1493   | -0.167  | 0.1148   |
| rs660895                                     | 6   | <i>HLA-DRB1</i>       | G  | 0.179     | 0.0290   | -0.151  | 0.0929   | 0.031   | 0.7256   |
| rs3778754                                    | 7   | <i>IRF5</i>           | G  | -0.128    | 0.1063   | 0.185   | 0.0350   | -0.058  | 0.5094   |
| rs11574914                                   | 9   | <i>CCL19-CCL21</i>    | A  | -0.162    | 0.0473   | 0.064   | 0.4730   | 0.029   | 0.7478   |
| rs653178                                     | 12  | <i>SH2B3-PTPN11</i>   | C  | 0.001     | 0.9953   | 0.119   | 0.1958   | -0.252  | 0.0056   |
| rs8026898                                    | 15  | <i>LOC145837</i>      | A  | 0.178     | 0.0415   | -0.106  | 0.2711   | -0.077  | 0.4191   |
| rs3218251                                    | 22  | <i>IL2RB</i>          | A  | 0.252     | 0.0039   | 0.071   | 0.4600   | -0.202  | 0.0327   |
| HLA Alleles/Amino Acid                       |     |                       |    |           |          |         |          |         |          |
| Allele/Amino Acid                            | Chr | Gene                  | A1 | Intercept |          | Slope 1 |          | Slope 2 |          |
|                                              |     |                       |    | $\beta$   | <i>P</i> | $\beta$ | <i>P</i> | $\beta$ | <i>P</i> |
| *15:01                                       | 6   | <i>HLA-DRB1</i>       | -  | -0.398    | 0.0031   | 0.027   | 0.8592   | 0.211   | 0.1487   |
| Aspartic acid at position 9 in HLA-B         | 6   | <i>HLA-B</i>          | -  | -0.234    | 0.0444   | 0.114   | 0.3721   | 0.017   | 0.8930   |
| Valine at position 11 in HLA-DR $\beta$ 1    | 6   | <i>HLA-DRB1</i>       | -  | 0.230     | 0.0054   | -0.179  | 0.0505   | -0.013  | 0.8842   |
| Histidine at position 13 in HLA-DR $\beta$ 1 | 6   | <i>HLA-DRB1</i>       | -  | 0.213     | 0.0103   | -0.181  | 0.0485   | 0.003   | 0.9756   |
| Alanine at position 71 in HLA-DR $\beta$ 1   | 6   | <i>HLA-DRB1</i>       | -  | -0.332    | 0.0108   | -0.024  | 0.8671   | 0.182   | 0.1980   |

SNP = single nucleotide polymorphism; A1 = reference allele; Slope 1 = DAS28 at months 0-6; Slope 2 = DAS28 at months 6-24.

**Supplementary Table 9. Genetic Variants Attaining a Significant or Nominal Association with HAQ Scores**

| SNPs        |     |                           |    |           |          |         |          |         |          |
|-------------|-----|---------------------------|----|-----------|----------|---------|----------|---------|----------|
| SNP         | Chr | Gene                      | A1 | Intercept |          | Slope 1 |          | Slope 2 |          |
|             |     |                           |    | $\beta$   | <i>P</i> | $\beta$ | <i>P</i> | $\beta$ | <i>P</i> |
| rs11889341* | 2   | <i>STAT4</i>              | T  | -0.150    | 0.0038   | -0.092  | 0.0433   | 0.142   | 0.0001   |
| rs1980422   | 2   | <i>CD28</i>               | C  | 0.100     | 0.0443   | -0.054  | 0.2149   | 0.045   | 0.1821   |
| rs9858105   | 3   | <i>IL20RB</i>             | C  | -0.367    | 0.0474   | -0.100  | 0.5333   | 0.207   | 0.0937   |
| rs660895    | 6   | <i>HLA-DRB1</i>           | G  | 0.021     | 0.6405   | -0.088  | 0.0215   | 0.064   | 0.0342   |
| rs7752903   | 6   | <i>TNFAIP3</i>            | G  | -0.227    | 0.0428   | 0.051   | 0.5990   | 0.094   | 0.2170   |
| rs3778754   | 7   | <i>IRF5</i>               | G  | -0.040    | 0.3475   | 0.076   | 0.0421   | -0.058  | 0.0462   |
| rs998731    | 8   | <i>TPD52</i>              | T  | -0.003    | 0.9339   | 0.079   | 0.0281   | -0.062  | 0.0271   |
| rs2061831   | 8   | <i>BLK</i>                | C  | 0.056     | 0.2268   | -0.082  | 0.0422   | -0.025  | 0.4362   |
| rs7073236   | 10  | <i>IL2RA</i>              | C  | 0.007     | 0.8619   | -0.078  | 0.0329   | 0.033   | 0.2440   |
| rs4409785   | 11  | <i>CEP57</i>              | C  | 0.122     | 0.0265   | -0.020  | 0.6829   | 0.041   | 0.2682   |
| rs653178*   | 12  | <i>SH2B3-PTPN11</i>       | C  | 0.019     | 0.6695   | 0.048   | 0.2134   | -0.109  | 0.0004   |
| rs701006    | 12  | <i>CDK4</i>               | G  | -0.089    | 0.0373   | -0.002  | 0.9574   | -0.009  | 0.7497   |
| rs8026898   | 15  | <i>LOC145837</i>          | A  | 0.104     | 0.0278   | 0.013   | 0.7483   | -0.064  | 0.0426   |
| rs9979383   | 21  | <i>RUNX1-LOC100506403</i> | T  | 0.029     | 0.5183   | -0.005  | 0.9061   | -0.068  | 0.0250   |
| rs1893592   | 21  | <i>UBASH3A</i>            | A  | 0.037     | 0.4327   | 0.000   | 0.2542   | -0.095  | 0.0348   |

  

| HLA Alleles/Amino Acid                       |     |                 |    |           |          |         |          |         |          |
|----------------------------------------------|-----|-----------------|----|-----------|----------|---------|----------|---------|----------|
| Allele/Amino Acid                            | Chr | Gene            | A1 | Intercept |          | Slope 1 |          | Slope 2 |          |
|                                              |     |                 |    | $\beta$   | <i>P</i> | $\beta$ | <i>P</i> | $\beta$ | <i>P</i> |
| *04:01                                       | 6   | <i>HLA-DRB1</i> | -  | 0.020     | 0.7122   | -0.111  | 0.0194   | 0.044   | 0.2437   |
| *04:04                                       | 6   | <i>HLA-DRB1</i> | -  | 0.013     | 0.8747   | -0.006  | 0.9348   | 0.117   | 0.0365   |
| Valine at position 11 in HLA-DR $\beta$ 1    | 6   | <i>HLA-DRB1</i> | -  | 0.041     | 0.3601   | -0.099  | 0.0106   | 0.071   | 0.0192   |
| Histidine at position 13 in HLA-DR $\beta$ 1 | 6   | <i>HLA-DRB1</i> | -  | 0.035     | 0.4347   | -0.097  | 0.0128   | 0.067   | 0.0288   |

\* = significant *P*-value for slope 2 after correction for multiple testing; SNP = single nucleotide polymorphism; A1 = reference allele; Slope 1 = HAQ scores at months 0-6; Slope 2 = HAQ scores at months 6-24.

## REFERENCES

1. Okada Y, Wu D, Trynka G, Raj T, Terao C, Ikari K, et al. Genetics of rheumatoid arthritis contributes to biology and drug discovery. *Nature* 2014;506:376-81.
2. Raychaudhuri S, Sandor C, Stahl EA, Freudenberg J, Lee H-S, Jia X, et al. Five amino acids in three HLA proteins explain most of the association between MHC and seropositive rheumatoid arthritis. *Nat Genet* 2012;44:291-6.
3. Eyre S, Bowes J, Diogo D, Lee A, Barton A, Martin P, et al. High-density genetic mapping identifies new susceptibility loci for rheumatoid arthritis. *Nat Genet* 2012;44:1336-40.
